# Supplementary material for: Embryogenic competence of microspores is associated with their ability to form a callosic, osmoprotective subintinal layer
Source: PubMed Central journal article supplement (PMC6382338; doi:10.1093/jxb/ery458), 2019-01-31

### *Supplementary data*

**Article title:** Embryogenic competence of microspores is associated to their ability to form a callosic, osmoprotective subintinal layer.

**Authors:** Alba Rivas-Sendra, Patricia Corral-Martínez, Rosa Porcel, Carolina Camacho-Fernández, Antonio Calabuig-Serna and Jose M. Seguí-Simarro

The following Supporting Information is available for this article:

**Table S1.** Primer pairs used for qPCR.

| <i>Gene name</i> | <i>Primer Sequence 5' to 3'</i> |
|------------------|---------------------------------|
| BnActin2 Forward | ACGAGCTACCTGACGGACAAG           |
| BnActin2 Reverse | GAGCGACGGCTGGAAGAGTA            |
| BnCalS5 Forward  | GTGGATTGAACTGGCCATCTG           |
| BnCalS5 Reverse  | GGTTTCTGACATTGTTTGCCTG          |
| BnCalS9 Forward  | GGAATGCTGATATGCTTG              |
| BnCalS9 Reverse  | GGCGGGATTGCTCATTAGC             |
| BnCalS10 Forward | GGCGATTAGATACTGAACATTTCC        |
| BnCalS10 Reverse | AAGTGTGAGAACCAGATGCTCC          |
| BnCalS12 Forward | TGCTACGGTTTGGATAATTGCT          |
| BnCalS12 Reverse | TCAGGGACCAAGAAAGCCAC            |

**Fig. S1: Overview of microspore cultures.** General views of the DH4079 (A), DH12075 (B) and DH36 (C) cultured populations, 3 (A, B) and 6 (C) days after culture initiation. Arrows point to embryogenic microspores, much more frequent in DH4079. Bars: 50  $\mu$ m.

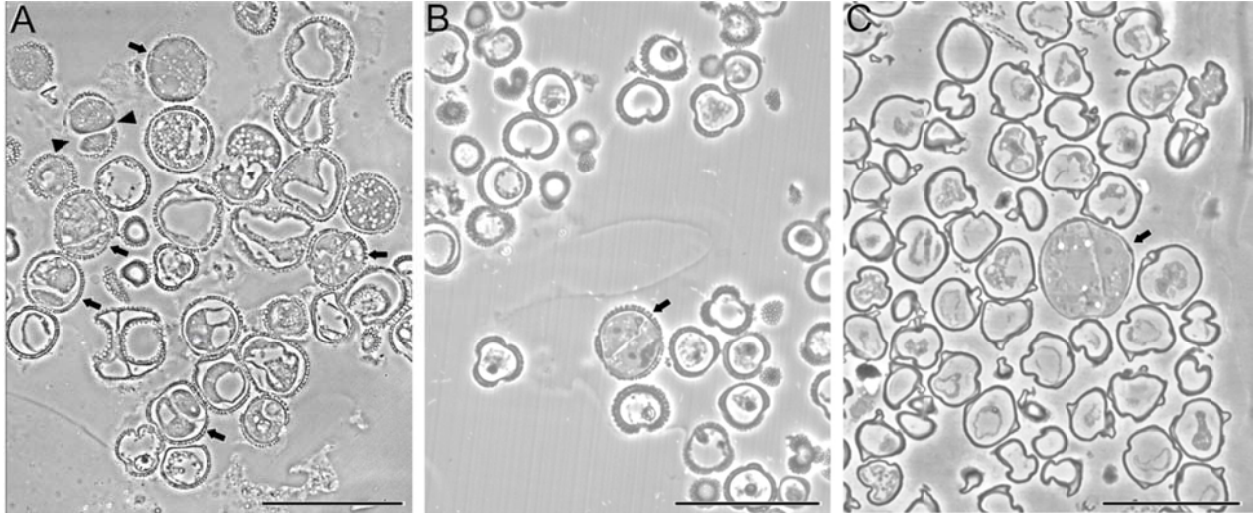

**Fig. S2: Morphometric analysis of inner wall and SL thickness** in the DH4079, DH12075 and DH36 lines. A: Average wall thickness comparison of the three lines. Different letters indicate significant differences as revealed by the Kruskal-Wallis and Bonferroni tests with  $\alpha \leq 0.05$ . B-D: Averages of all the measurements done for each of the 15 individual cells analyzed for DH4079 (B), DH12075 (C) and DH36 (D). Results are expressed as thickness  $\pm$  S.D.

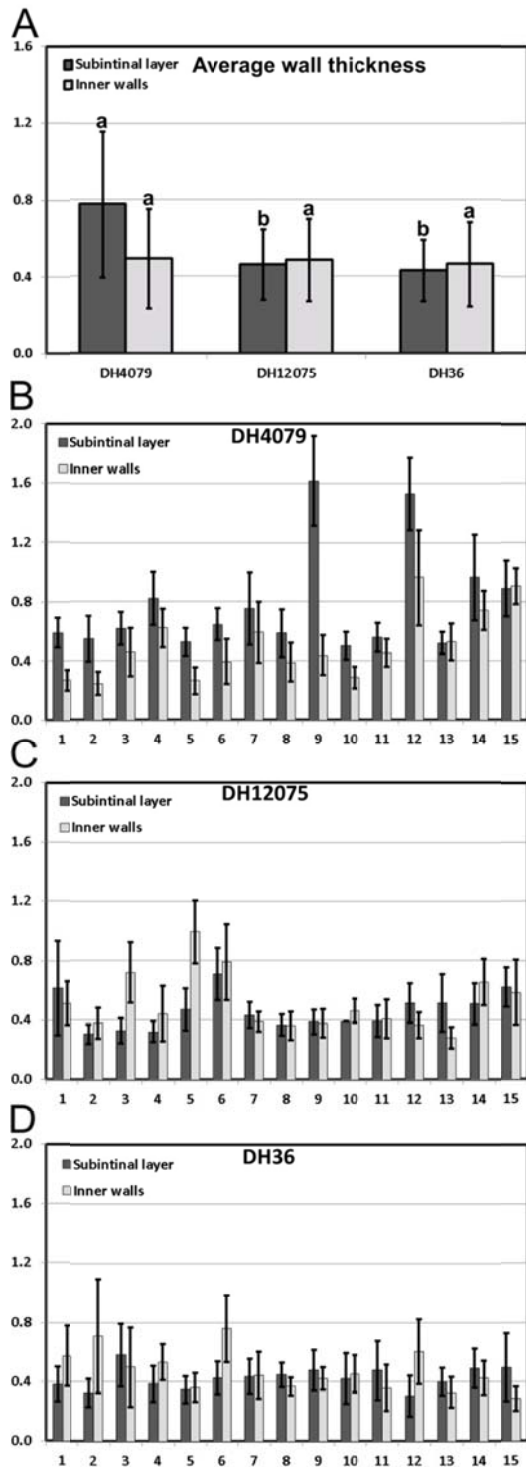

**Fig. S3: Dynamics of  $\text{Ca}^{2+}$  in rapeseed DH12075 cultured microspores.** Phase contrast (A-C) and FluoForte fluorescent staining (A'-C') pairs of pictures are shown. A, A': Just divided, embryogenic microspore with a moderate and principally nuclear-cytosolic (not vacuolar)  $\text{Ca}^{2+}$  signal. Arrowheads indicate inner cell walls. B, B': Multicellular embryogenic structure with almost no detectable  $\text{Ca}^{2+}$  signal. C, C': Pollen-like structure with a faint, punctate  $\text{Ca}^{2+}$  signal. ex: exine; n: nucleus; v: vacuole. Bars: 10  $\mu\text{m}$ .

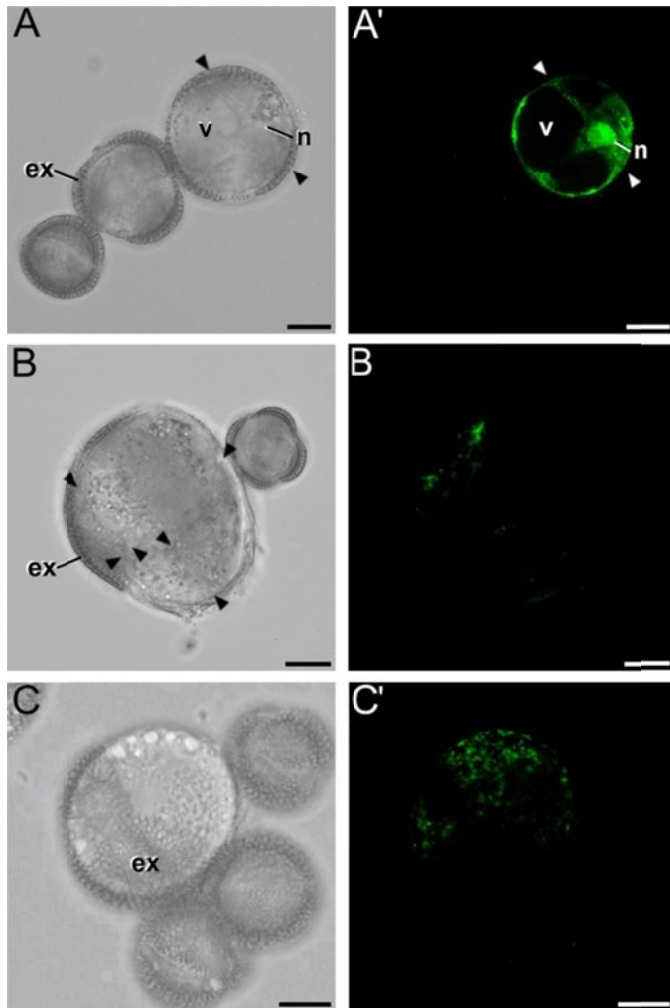

**Fig. S4: Dynamics of  $\text{Ca}^{2+}$  in eggplant DH36 cultured microspores.** Phase contrast (A-C) and FluoForte fluorescent staining (A'-C') pairs of pictures are shown. A, A': Freshly isolated microspore showing a faint nuclear-cytosolic (not vacuolar)  $\text{Ca}^{2+}$  signal. B, B': Just divided, embryogenic microspore with a moderate nuclear-cytosolic, but also vacuolar  $\text{Ca}^{2+}$  signal. Arrowheads indicate inner cell walls. C, C': Embryogenic structure with reduced nuclear-cytosolic and vacuolar  $\text{Ca}^{2+}$  signal. D, D': Multicellular embryogenic structure with almost no detectable  $\text{Ca}^{2+}$  signal. n: nucleus; v: vacuole. Bars: 10  $\mu\text{m}$ .

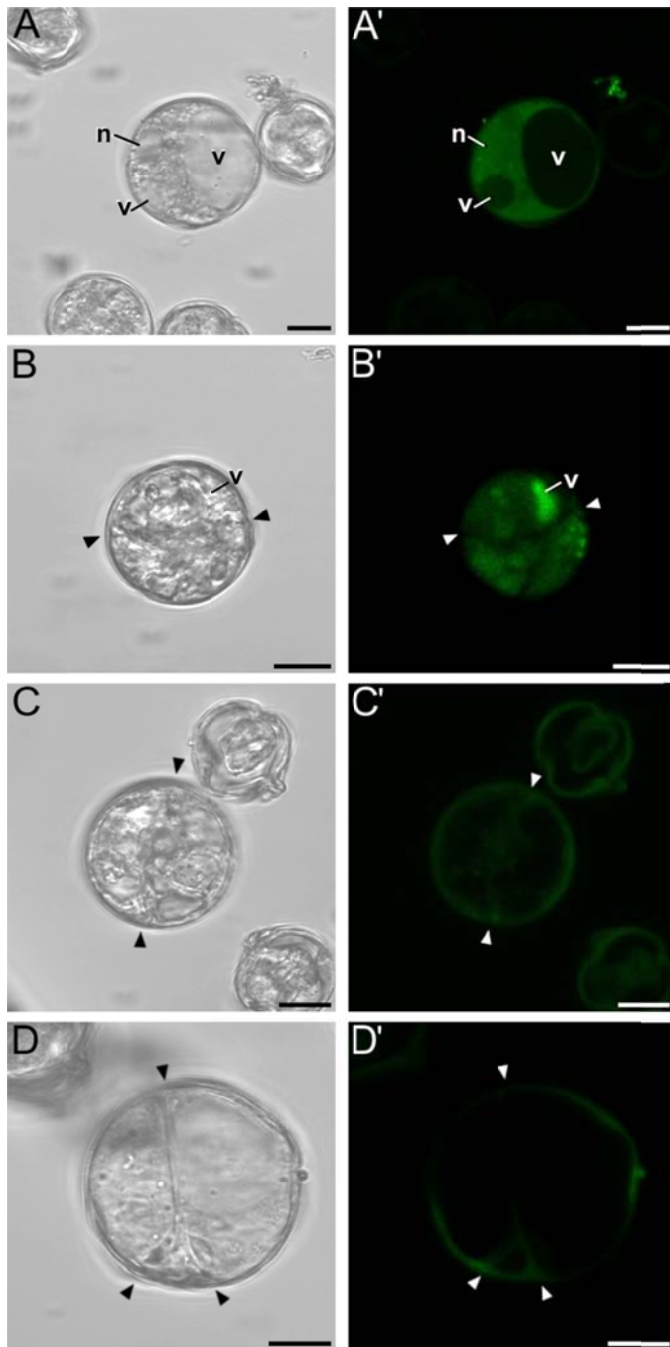

**Fig. S5. Rapeseed DH4079 microspores treated with ES7 25  $\mu$ M.** A: DAPI (blue) stained 3-day old microspore showing two fusing nuclei. B: 3 day-old embryogenic microspore stained with aniline blue for callose (blue) and propidium iodide (red). Note that the red fluorescence of exine is due to autofluorescence, not to propidium iodide staining. C: 3-day old embryogenic microspore stained with S4B for cellulose (red) and DAPI (blue). cw: cell wall; ex: exine; n: nucleus; sl: subintinal layer. Bars: 10  $\mu$ m.

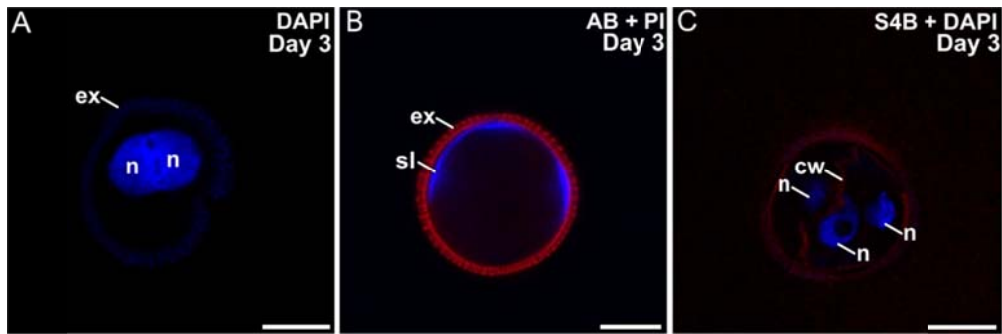

Supplement: ery458_suppl_supplementary-figures-s1-s5.pdf [file ery458_suppl_supplementary-figures-s1-s5.pdf]
